# Supplementary material
Source: ML conference proceedings conference paper supplement (https://openaccess.thecvf.com/content/ICCV2023/html/Pan_Scanning_Only_Once_ICCV_2023_paper.html)
Supplement: Supplementary file 1 [file Pan_Scanning_Only_Once_ICCV_2023_supplemental.pdf]

# Scanning Only Once: An End-to-end Framework for Fast Temporal Grounding in Long Videos

## – Supplementary Material –

### A. Qualitative Grounding Results

Recall that this work targets the temporal grounding in long videos. It proposes a tailored framework as well as training objectives, alleviating the inefficiency, insufficiency and inflexibility issues caused by the sliding window pipeline. We provide some qualitative results in Fig. 1 and Fig. 2 to illustrate the effectiveness of our method. They suggest, our method can achieve flexible boundary localization for various-length target segments. Besides, thanks to the content-enhanced re-ranking, some inconspicuous objects which usually perturbed by other frames can be detected (*e.g.*, the wooden ferry in the third sample of

Fig. 1), hence facilitates accurate temporal localization.

Despite the effectiveness, due to the fact that the sentence feature is pre-extracted considering efficiency, some word-to-object alignment may get lost. Here we provide some failure cases of our method in Fig. 3. We observe from top to bottom, our method misunderstands “*skids*”, “*a*”, “*kerosene lanterns*”, “*smoke*”, “*soup*”, “*carton*” in turn. They suggest that, the lack of explicit token-level semantic alignment learning leads to inadequate semantic analysis to some extent, which is left as our future work.

| Query                                                                                                                        | Video Id                                | Ground Truth                                                                        |                                                                                     |                                                                                     | Top1 Prediction ✓                                                                    |                                                                                       |                                                                                       |
|------------------------------------------------------------------------------------------------------------------------------|-----------------------------------------|-------------------------------------------------------------------------------------|-------------------------------------------------------------------------------------|-------------------------------------------------------------------------------------|--------------------------------------------------------------------------------------|---------------------------------------------------------------------------------------|---------------------------------------------------------------------------------------|
| <i>sitting at a crowded desk, stacked with manuscripts, a young man with dark curly hair and glasses answers telephones.</i> | 3007_A_THOUSAND_WORDS                   | 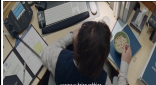 | 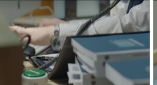 | 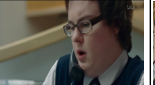 | 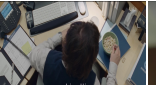 | 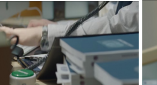 | 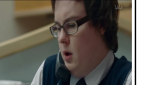 |
|                                                                                                                              |                                         | 285.5s – 295.4s                                                                     |                                                                                     |                                                                                     | 285.3s – 294.7s                                                                      |                                                                                       |                                                                                       |
| <i>filled with snow dusted statues of hooded figures standing with their hands clasped and their heads bowed.</i>            | 3033_HUGO                               | 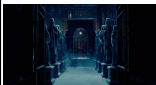 | 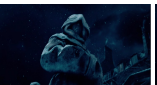 | 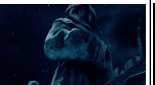 | 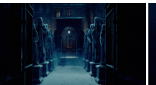 | 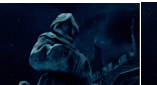 | 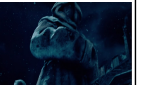 |
|                                                                                                                              |                                         | 890.2s – 897.7s                                                                     |                                                                                     |                                                                                     | 890.4s – 898.2s                                                                      |                                                                                       |                                                                                       |
| <i>someone rides along a track to a wide river with a wooden ferry.</i>                                                      | 3085_TRUE_GRIT                          | 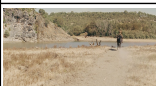 | 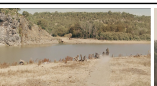 | 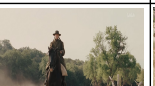 | 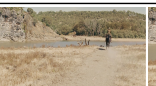 | 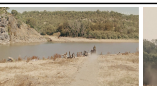 | 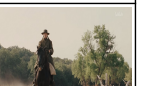 |
|                                                                                                                              |                                         | 2046.6s – 2052.8s                                                                   |                                                                                     |                                                                                     | 2046.6s – 2052.9s                                                                    |                                                                                       |                                                                                       |
| <i>she walks off.</i>                                                                                                        | 0016_O_Brother_Where_Art_Thou           | 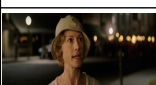 | 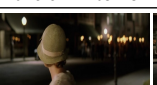 | 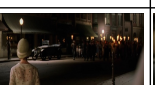 | 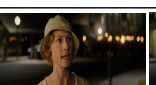 | 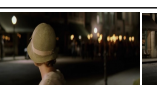 | 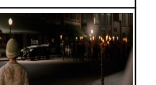 |
|                                                                                                                              |                                         | 5565.5s – 5568.9s                                                                   |                                                                                     |                                                                                     | 5565.5s – 5568.9s                                                                    |                                                                                       |                                                                                       |
| <i>the ford coupe pulls up in front of the house.</i>                                                                        | 0050_Indiana_Jones_and_the_last_crusade | 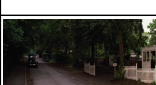 | 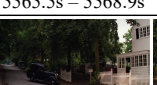 | 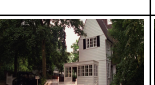 | 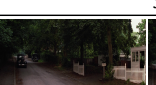 | 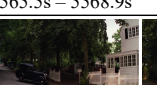 | 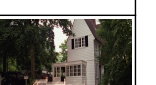 |
|                                                                                                                              |                                         | 1335.9s – 1340.5s                                                                   |                                                                                     |                                                                                     | 1335.9s – 1340.3s                                                                    |                                                                                       |                                                                                       |
| <i>a hazy orange sun rises above the teeming streets, slums and skyscrapers of mumbai.</i>                                   | 1006_Slumdog_Millionaire                | 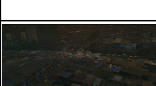 | 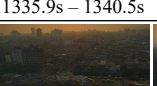 | 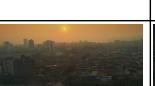 | 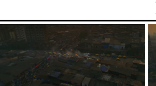 | 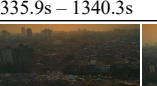 | 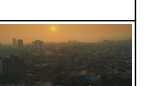 |
|                                                                                                                              |                                         | 833.9s – 840.2s                                                                     |                                                                                     |                                                                                     | 833.7s – 839.9s                                                                      |                                                                                       |                                                                                       |

Figure 1. Visualization of some qualitative results on MAD.

| Query                                          | Video Id                              | Ground Truth                                                                                         | Top1 Prediction ✓                                                                                     |
|------------------------------------------------|---------------------------------------|------------------------------------------------------------------------------------------------------|-------------------------------------------------------------------------------------------------------|
| what meat did i fry in the pan?                | eb04561c-2ffd-4ea1-aab4-7cadec24db9f9 | 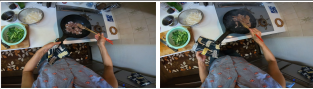<br>90.0s – 144.0s  | 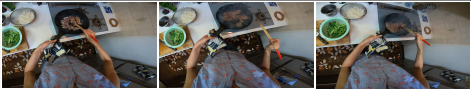<br>98.5s – 149.4s  |
| in what location did i last see the mitten?    | ff6d3d52-dda5-46dd-8515-b9b772933030  | 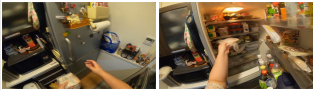<br>194.0s – 198.1s | 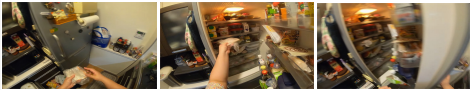<br>192.8s – 197.9s |
| how many carrots did i pick?                   | fbcd25c4-def6-49a7-8b88-5d5d00b5524e  | 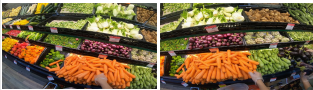<br>463.6s – 495.4s | 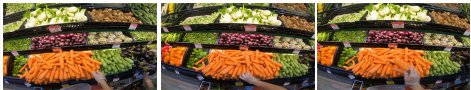<br>466.9s – 493.8s |
| how many plates did i take from the top shelf? | 404cc1c1-f7a0-4e16-9a39-b8c2d5d9ae59  | 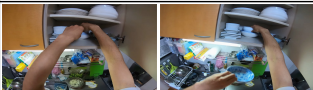<br>323.0s – 330.0s | 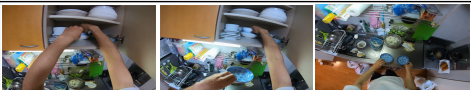<br>323.5s – 329.6s |
| who did i interact with when i was standing?   | e4a01f13-4f09-4ee4-ae13-17af72eaca87  | 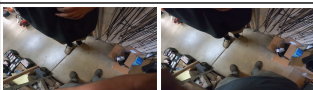<br>0.0s – 3.0s     | 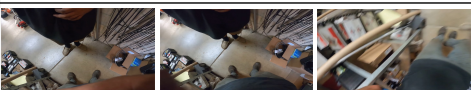<br>0.0s – 3.1s     |
| what did i put in the plate?                   | 224c3de4-9683-462a-8eb4-224773425a7e  | 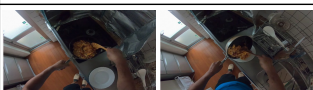<br>303.2s – 350.0s | 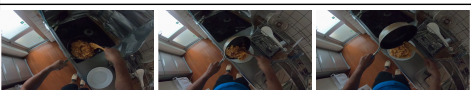<br>311.5s – 346.3s |

Figure 2. Visualization of some qualitative results on Ego4d-Video-NLQ.

| Query                                                                                   | Video Id                                | Ground Truth                                                                                           | Top1 Prediction ✗                                                                                         |
|-----------------------------------------------------------------------------------------|-----------------------------------------|--------------------------------------------------------------------------------------------------------|-----------------------------------------------------------------------------------------------------------|
| the dog skids across the polished floor as he runs up the hallway opposite the toyshop. | 3033_HUGO                               | 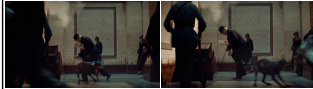<br>448.9s – 450.9s | 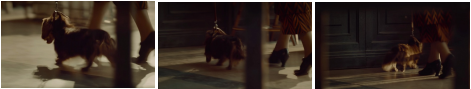<br>1414.1s – 1422.2s |
| someone takes a complimentary coffee and leaves.                                        | 3007_A_THOUSAND_WORDS                   | 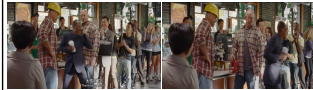<br>326.4s – 330.1s | 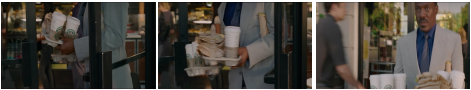<br>1767.0s – 1770.8s |
| the light of kerosene lanterns dances on the tunnel walls ahead.                        | 0050_Indiana_Jones_and_the_last_crusade | 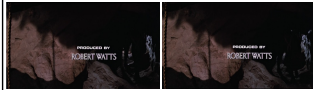<br>597.3s – 598.0s | 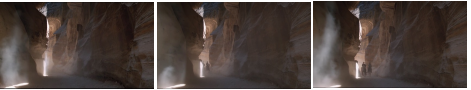<br>1336.7s – 1341.6s |
| the prisoner, someone, blinks rapidly as the smoke stings his eyes.                     | 1006_Slumdog_Millionaire                | 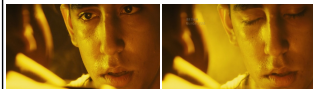<br>84.6s – 90.2s   | 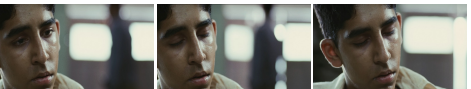<br>5786.2s – 5793.9s |
| what did i use to stir the soup?                                                        | 413fe086-1745-4573-b75b-e7d26ff72df9    | 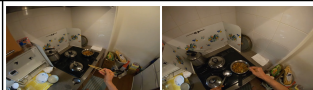<br>0.2s – 5.0s     | 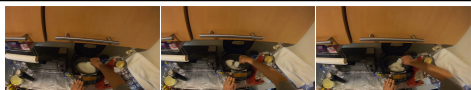<br>437.9s – 495.5s   |
| where did i put carton?                                                                 | 38737402-19bd-4689-9e74-3af391b15feb    | 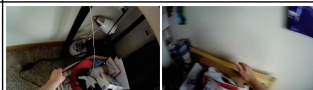<br>808.0s – 814.0s | 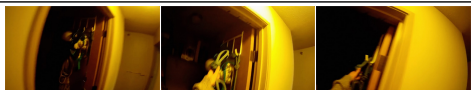<br>1366.9s – 1369.7s |

Figure 3. Visualization of some failure cases on MAD and Ego4d-Video-NLQ.
